# Supplementary material for: A novel rice fragile culm 24 mutant encodes a UDP-glucose epimerase that affects cell wall properties and photosynthesis
Source: PubMed Central journal article supplement (PMC7260720; doi:10.1093/jxb/eraa044), 2020-02-17

**A novel rice *fragile culm 24* mutant encodes a UDP-glucose epimerase that affects cell wall property and photosynthesis**

Ran Zhang<sup>1</sup>, Huizhen Hu<sup>2</sup>, Youmei Wang<sup>1</sup>, Zhen Hu<sup>1</sup>, Shuangfeng Ren<sup>1</sup>, Jiaying Li<sup>1</sup>,  
Boyang He<sup>1</sup>, Yanting Wang<sup>1</sup>, Tao Xia<sup>1,3</sup>, Peng Chen<sup>1</sup>, Guosheng Xie<sup>1</sup>, Liangcai Peng<sup>1\*</sup>

<sup>1</sup> Biomass & Bioenergy Research Centre, College of Plant Science & Technology, Huazhong Agricultural University, Wuhan 430070, China.

<sup>2</sup> State Key Laboratory of Biocatalysis & Enzyme Engineering, College of Life Science, Hubei University, Wuhan 430062, China.

<sup>3</sup> College of Life Science & Technology, Huazhong Agricultural University, Wuhan 430070, China.

**Supplemental Table S1.** Primers for map-based cloning of *Osf24*.

| <b>Primer name</b> | <b>Primer sequence (5' to 3')</b> |
|--------------------|-----------------------------------|
| RM22978-F          | ACACGTTTGTACGTTTCGTTTCG           |
| RM22979-R          | GCCGACAAACACTCTCATTGG             |
| RM5767-F           | GTCCGACTCACCTCCCTCTTGC            |
| RM5768-R           | CCTCATCCTCTCCACGCTCTCC            |
| C2-F               | CAGCAATAAGATGCTACAAGAA            |
| C2-R               | GAAAACGAAATAAACAAACTCC            |
| C6-F               | AGCCACCGACCAAATAATCAG             |
| C6-R               | GGACGGCGGAAGTATCTCAAT             |

**Supplemental Table S2.** Primers for functional studies of *OsUGE2*.

| Primer name     | Primer sequence (5' to 3')            | Purpose                                                     |                                                                 |
|-----------------|---------------------------------------|-------------------------------------------------------------|-----------------------------------------------------------------|
| Promoter-UGE2-F | ATTGAAAGATGAAGACAGGGGAC               | Promoter cloning of <i>OsUGE2</i>                           |                                                                 |
| Promoter-UGE2-R | GAATGTGGGGAGGAGAAGAGTAG               |                                                             |                                                                 |
| CDS-UGE2-F      | CCTGAATCCCTCCTCCTACTCT                | CDS region cloning of <i>OsUGE2</i>                         |                                                                 |
| CDS-UGE2-R      | CCCGGGAAGAGAAAACATGAGCATCGGT          |                                                             |                                                                 |
| Q-OsUGE1-F      | TACTGCTCCGATACTTCAACCC                | Q-PCR of <i>OsUGEs</i>                                      |                                                                 |
| Q-OsUGE1-R      | CCATCCGCTAGATCAACAACAT                |                                                             |                                                                 |
| Q-OsUGE2-F      | TATGGATACGGGTCACCTTGACTC              |                                                             |                                                                 |
| Q-OsUGE2-R      | ACCAGTCCATATCCGTTGTGAC                |                                                             |                                                                 |
| Q-OsUGE3-F      | TGGAACAGGAAAGGGAACATC                 |                                                             |                                                                 |
| Q-OsUGE3-R      | TCGTGGACCAATAACCAAAGG                 |                                                             |                                                                 |
| Q-OsUGE4-F      | TCGCTACTCCTGACATTGGTT                 |                                                             |                                                                 |
| Q-OsUGE4-R      | TGATCGCCCTAATTCTGCTC                  |                                                             |                                                                 |
| Q-OsPHD1-F      | CTGTGACAATAAGCCTCTTTCCAG              |                                                             |                                                                 |
| Q-OsPHD1-R      | GCTCCCAACCAATCTCAGAAC                 |                                                             |                                                                 |
| Mse I-UGE2-F    | TGGTGATGCGGAGATT                      |                                                             | Amplify the fragment covered the mutation site of <i>Osfc24</i> |
| Mse I-UGE2-R    | CGTTATGCTTGGCAGAGT                    |                                                             |                                                                 |
| GFP-UGE2-F      | CAGTGGTCTCACAAACATGGCGGTGGAGAAGACGGT  | Subcellular localization of <i>OsUGE2</i>                   |                                                                 |
| GFP-UGE2-R      | CAGTGGTCTCATAACAGTGGAAAGTGGCCGTTGCCGT |                                                             |                                                                 |
| 28a-OsUGE2-F    | CGGGATCCATGGCGGTGGAGAAGACG            | Recombinant expression of <i>OsUGE2</i> in <i>E. coli</i> . |                                                                 |
| 28a-OsUGE2-R    | CCCAAGCTTGTGGAAGTGGCCGTTGC            |                                                             |                                                                 |

**Supplemental Table S3.** Primers for qRT- PCR of *OsSUSs* and *OsCESAs*.

| <b>Primer name</b> | <b>Primer sequence (5' to 3')</b> |
|--------------------|-----------------------------------|
| Q-SUS1-F           | CATCTCAGGCTGAGACTCTGA             |
| Q-SUS1-R           | CAAATTCAATCGACCTTACTT             |
| Q-SUS2-F           | GAGGCTGATGACCTTGACTGG             |
| Q-SUS2-R           | CCCTCCATTACTTGGATGTGCT            |
| Q-SUS3-F           | GTGAGACACGCCGCTACCTGGAGA          |
| Q-SUS3-R           | CCCTGAAATCAACTAAACCCT             |
| Q-SUS4-F           | TGAACTGGCGAAGACTGTACC             |
| Q-SUS4-R           | CAATGGCAATGAAGCACTGAG             |
| Q-SUS5-F           | CAGGTTAGCCGGGCAGAAG               |
| Q-SUS5-R           | CATTGTACACAAATCTCACGCAAG          |
| Q-SUS6-F           | CGAACAACCAGCACAACTAC              |
| Q-SUS6-R           | GGAGCAGTGGTCCAAGTAAGT             |
| Q-CESA1-F          | GGCATGGTGGCGGGTATAT               |
| Q-CESA1-R          | AGGCGACGGCTTTCTGAGT               |
| Q-CESA3-F          | GTGTAGATAGAAACACGAAAGGTG          |
| Q-CESA3-R          | CAATGGGCACCCACACACGT              |
| Q-CESA4-F          | CCATCGTCTACCCGTTCCACC             |
| Q-CESA4-R          | TCCAGCCCAGCAATCATCTT              |
| Q-CESA5-F          | CCTTGTTAATACCCCTACC               |
| Q-CESA5-R          | AATCCAAACCACACTCCTCC              |
| Q-CESA6-F          | GAAGGCAAAACAGCACACCCA             |
| Q-CESA6-R          | CCAAGTAAGCTCAGCGATGA              |
| Q-CESA7-F          | TTAACGGGGTTCAAGATGC               |
| Q-CESA7-R          | ATGGTGTGGTGTAGGCGA                |
| Q-CESA8-F          | TGGTCGGTGTGTTGCTGG                |
| Q-CESA8-R          | ATGGTCGGAGTGC GGTTTT              |
| Q-CESA9-F          | TACAAGAACGGCAACCTCA               |
| Q-CESA9-R          | AAGAACA AACTCGCAAACG              |
| Q-UBQ-F            | CCAGGACAAGATGATCTGCC              |
| Q-UBQ-R            | AAGAAGCTGAAGCATCCAGC              |

## Supplemental Figure Legends

**Supplemental Figure S1.** Leaf green-color quantification of *Osfc24* mutant. (A) Leaf phenotype at heading stage. (B) Color quantification. Error bars represent mean  $\pm$  SD (three biological replicates) with Student's *t*-test for significant difference,  $n \geq 10$  leaves in were measured in each replicate. The rate (%) calculated by subtraction of values between the WT and *Osfc24* divided by the WT value. Scale bar indicates 2 cm in (A).

**Supplemental Figure S2.** Genetic complementation test of rice brittleness mutant *Osfc24* by *pFC24F*. (A) Plant height; (B) Tiller number; (C) Breaking force; (D) extension force of 2<sup>nd</sup> internode at heading stage (E) Cell wall compositions of mature plants of wild type (WT) and *pFC24F*. Error bars represent mean  $\pm$  SD (three biological replicates) with Student's *t*-test for significant difference,  $n \geq 20$  plants in (A-D) were measured in each replicate.

**Supplemental Figure S3.** Protein sequence alignment of the UGE protein family in rice and *Arabidopsis*. Green asterisk represents the mutated amino acid site.

**Supplemental Figure S4.** Prediction of OsUGE2 protein domain by TMHMM2.0 program.

**Supplemental Figure S5.** Transcriptional analysis of *OsUGEs* and *OsPHD1* genes in stems tissues of the *Osfc24* mutant. *Ubiquitin* gene used as internal standard. Error bars represent mean  $\pm$  SD (three biological replicates). \*\**P* < 0.01 by Student's *t*-test.

**Supplemental Figure S6.** UGE activity in stem tissues of the *Osfc24* mutant. Error bars represent mean  $\pm$  SD (three biological replicates). \*\**P* < 0.01 by Student's *t*-test. The rate (%) calculated by subtraction of values between the WT and *Osfc24* divided by the WT value.

**Supplemental Figure S7.** Stomatal conductance and transpiration rate in the *Osfc24*

mutant. Values represent means  $\pm$  SD, n = 12. **\*\*** $P < 0.01$  by t-test.

**Supplemental Figure S8.** Transcriptional analysis of *OsCESAs* in young root tissues of the WT under Yariv treatment. (A) Germinated seeds were treated with  $\beta$ -glucosyl Yariv reagent (50  $\mu$ M) for 5 days. (B) Fold of change on *OsCESAs* after Yariv treatment. *Ubiquitin* gene used as internal standard. Error bars represent mean  $\pm$  SD (three biological replicates). **\*\*** $P < 0.01$  by Student's t-test.

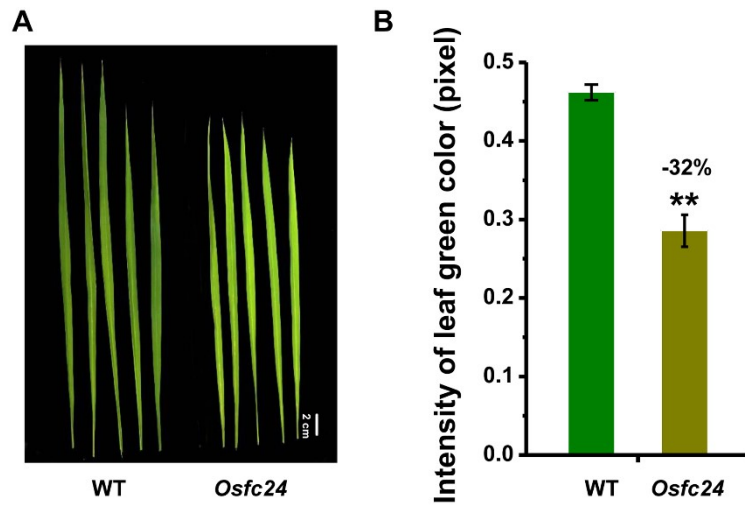

Zhang *et al.*, Supplemental Figure S2

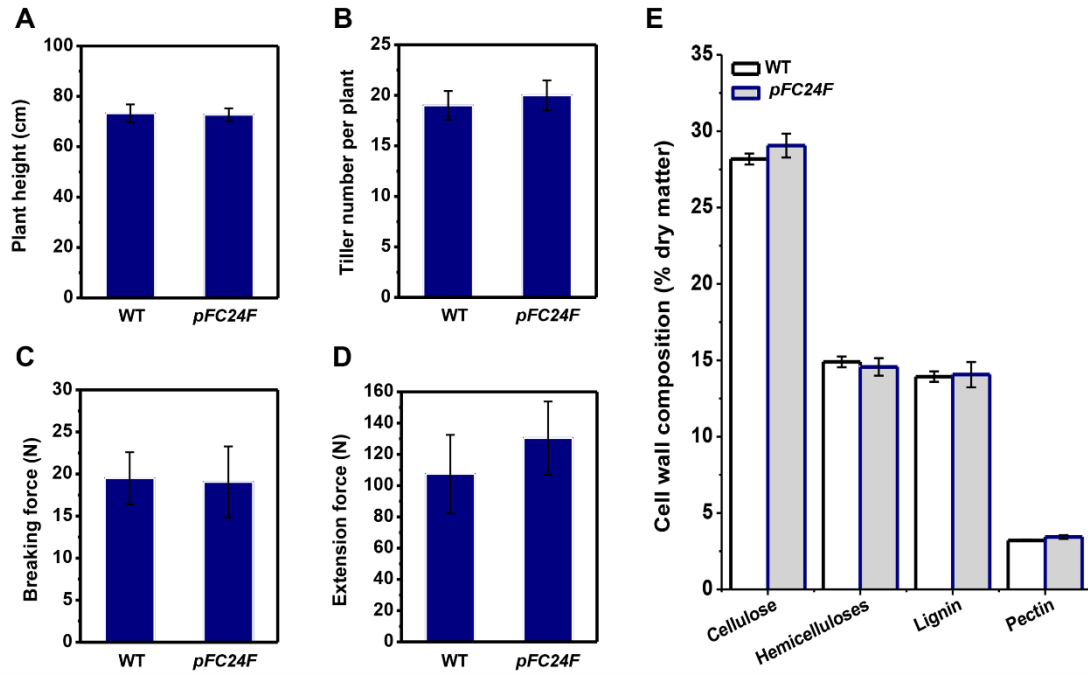



Zhang et al., Supplemental Figure S3

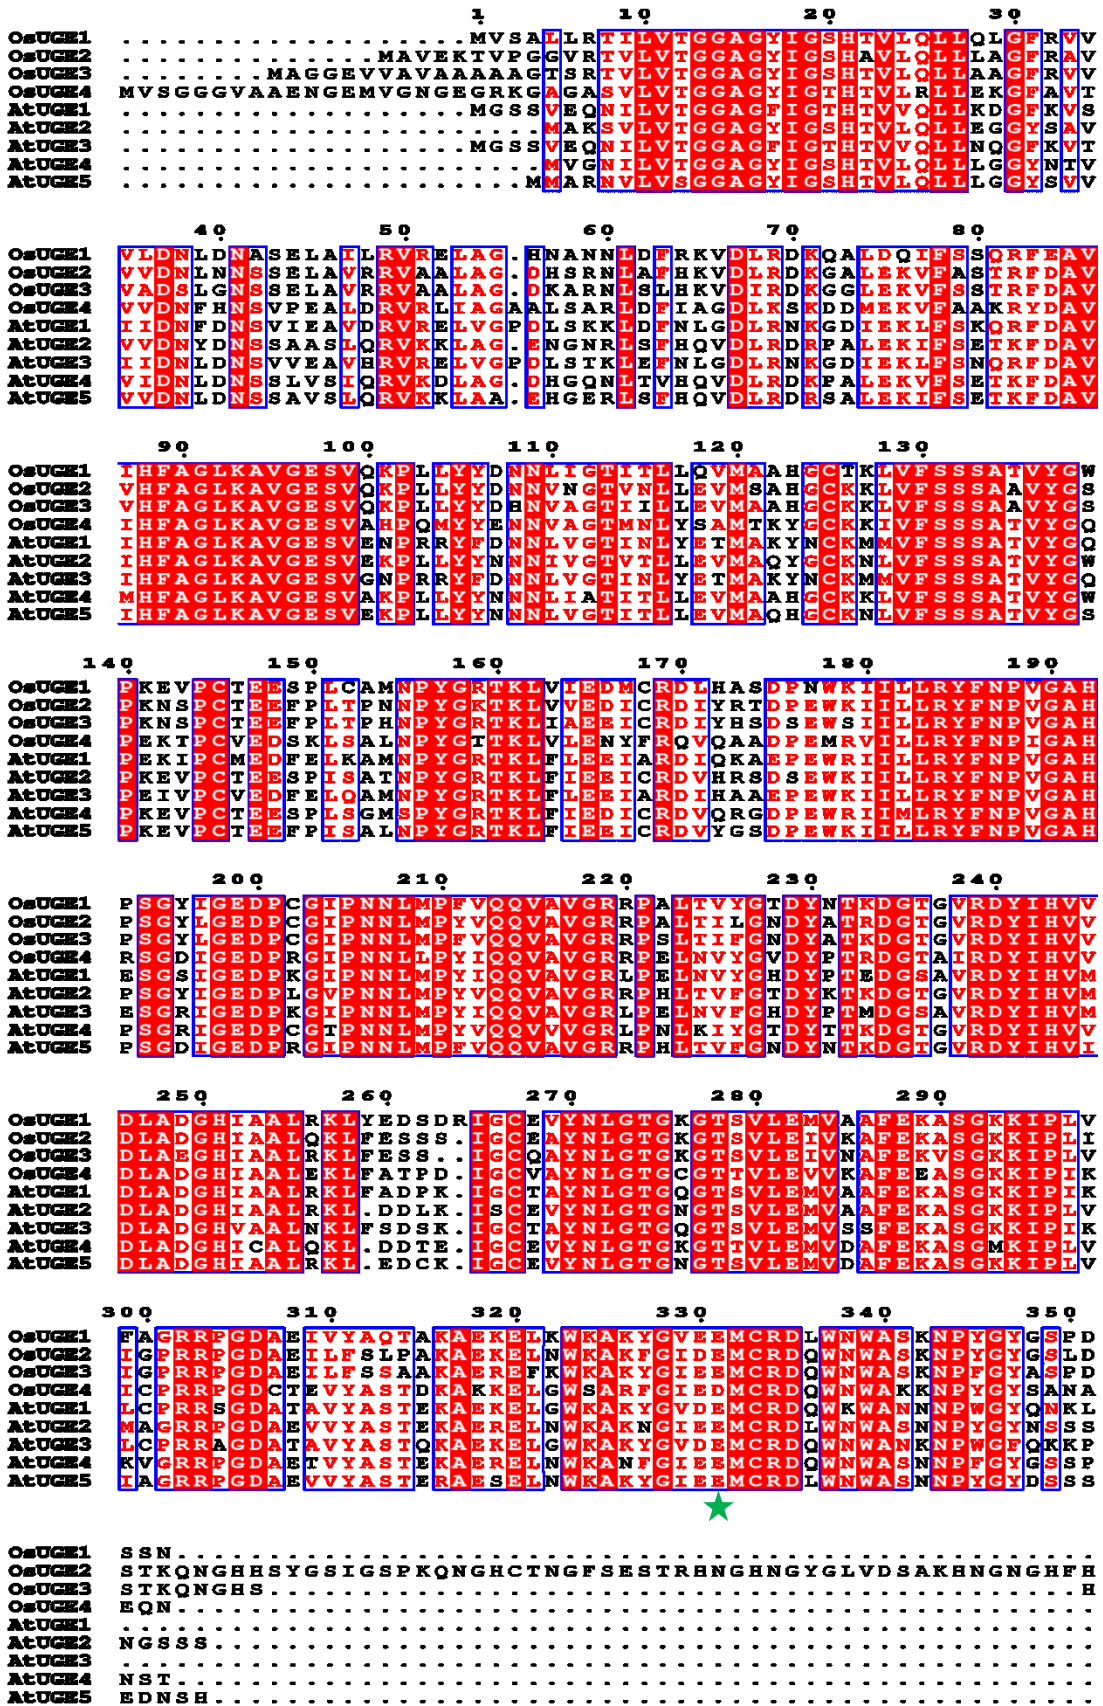

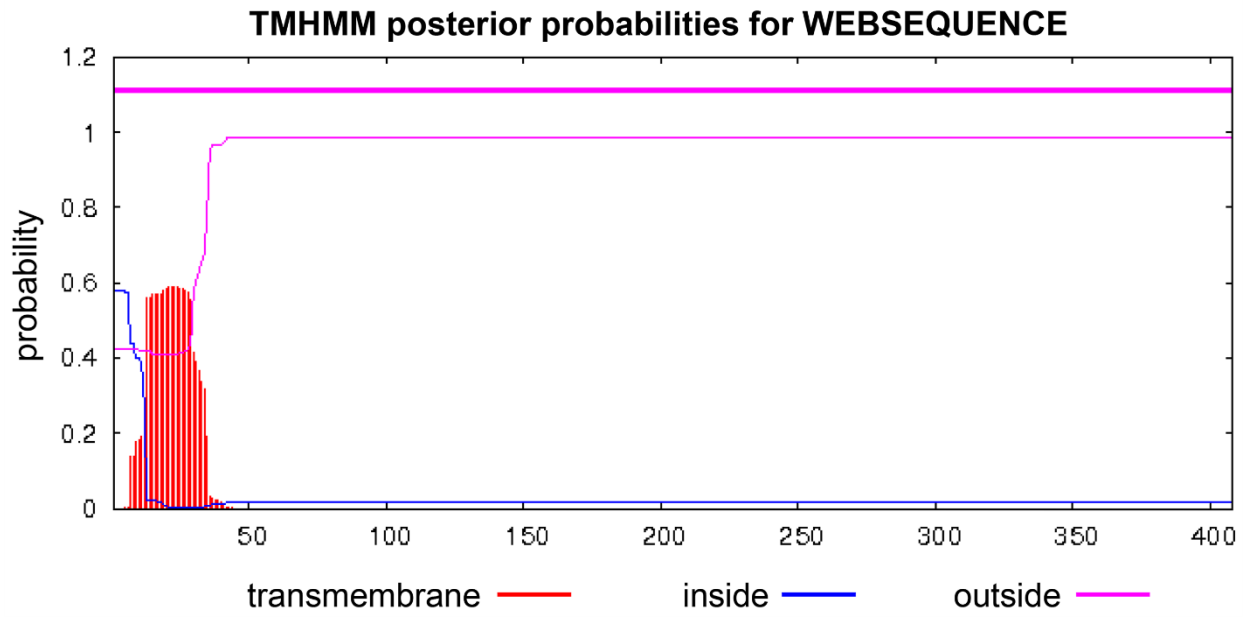

Zhang *et al.*, Supplemental Figure S5

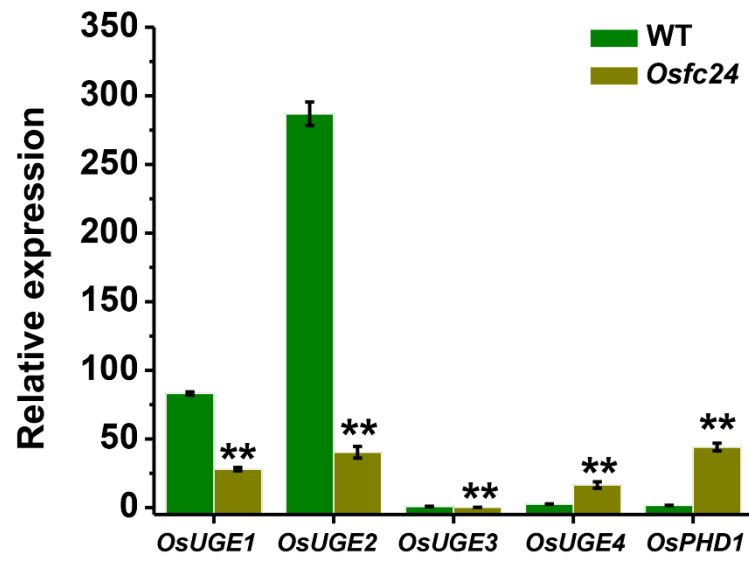

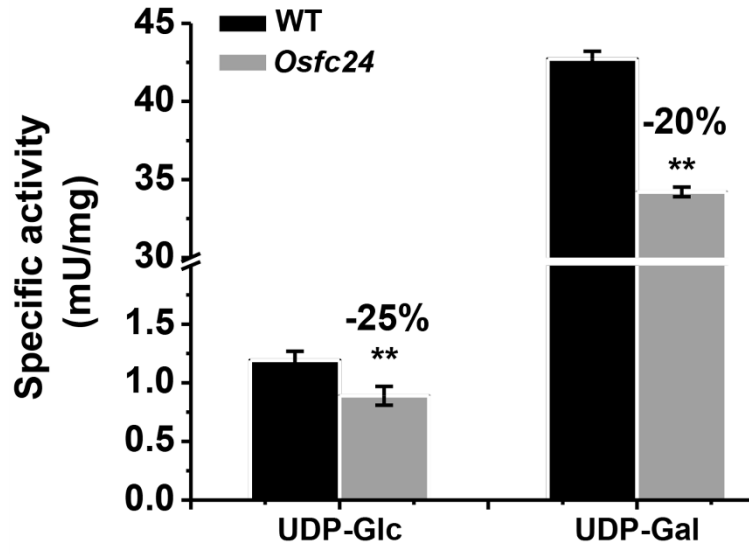

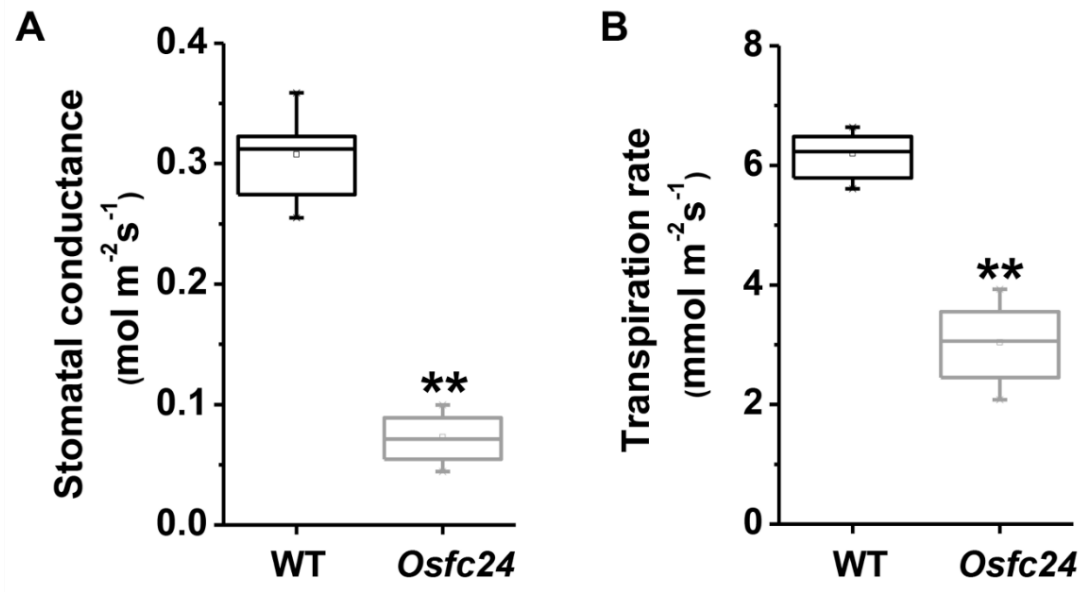

Zhang *et al.*, Supplemental Figure S8

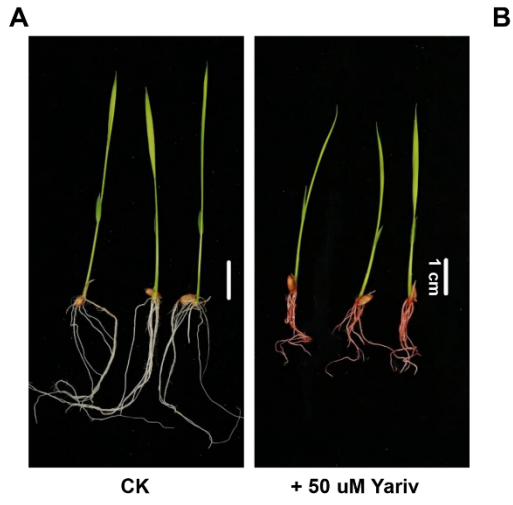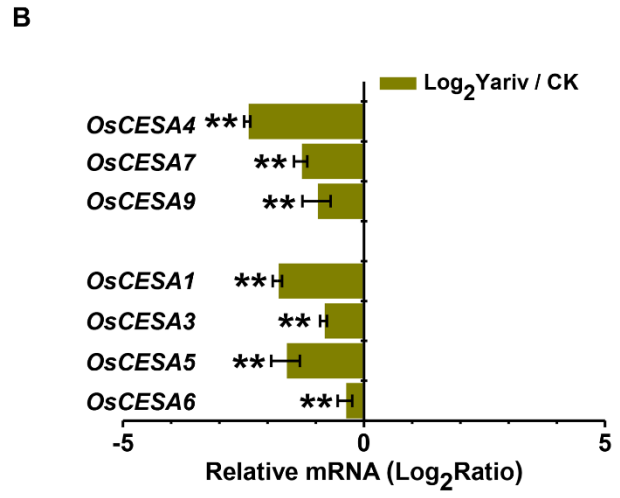

Supplement: eraa044_suppl_supplementary_tables_s1_s3_figures_s1_s8.pdf [file eraa044_suppl_supplementary_tables_s1_s3_figures_s1_s8.pdf]
